# Supplementary material for: Impact of general practice endorsement on the social gradient in uptake in bowel cancer screening
Source: PubMed Central journal article supplement — Br J Cancer. 2016 Jan 7;114(3):321–6. doi: 10.1038/bjc.2015.413 (PMC4742577; doi:10.1038/bjc.2015.413), 2016-01-07
Supplement: bjc2015413x1.pdf [file bjc2015413x1.pdf]

## Supplementary Appendix A: General Practice Endorsement S1 pre-invitation letter

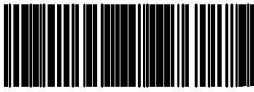

NHS No: 123 456 7890

10 June 2013

Mrs A B Example  
1 The Street  
Newtown  
AB1 1CD

### ***Bowel Cancer Screening Programme***

Midlands and North West Bowel Cancer Screening Programme Hub  
Rugby Hospital  
Rugby  
The Midlands  
RG3 2TH

**Freephone Helpline: 0800 707 60 60**

Email: [bowel.screening@uhcw.nhs.uk](mailto:bowel.screening@uhcw.nhs.uk)

Open: Mon to Fri 9:00am to 5:00pm  
Sat 9:00am to 12:00pm  
Sun 10:30am to 12:30pm

S1# 4301/1/264

Dear Mrs A B Example

Your GP practice, WWWW WWWW WWWW WWWW WWWW WWWW WWWW WWWW WWWW, supports the Bowel Cancer Screening Programme

This is an invitation to take part, or take part again, in the NHS Bowel Cancer Screening Programme. The programme aims to detect bowel cancer early, when successful treatment and cure is more likely. Screening is offered every two years to people aged 60-69 who are registered with a GP in England. We are starting to extend the screening age range, so if you are aged 70-74, you are being invited as part of this process.

You will be sent a test kit with full instructions in about two weeks. The kit is simple to use in the privacy of your own home. If you want to be screened, wait until the kit arrives, follow the instructions, and return the kit in the **reply paid** envelope provided. You will get your results by letter within 2 weeks.

We do not have your medical history, and screening is not appropriate for everyone. **If you have already been referred to hospital by your GP for bowel investigations, or if you have had previous bowel surgery, then screening may not be appropriate for you. Please call us for advice.** If you don't wish to be screened, then please call and let us know. The **Freephone** number for all calls is at the top of this letter (calls are free from UK landlines).

If you need help from family or a carer in order to use the kit, please call us (or ask them to call us) for further important information. You can also use the **Freephone** number if you have any questions about taking part in the programme. Finally, please take the time to read the enclosed leaflet 'Bowel Cancer Screening - The Facts', which may help to answer any questions you may have.

Yours sincerely

CR329 Local Signatory
